# Supplementary material for: Transcriptomic Features of Echinococcus granulosus Protoscolex during the Encystation Process
Source: PubMed Central journal article supplement — Korean J Parasitol. 2020 Jun 26;58(3):287–99. doi: 10.3347/kjp.2020.58.3.287 (PMC7338903; doi:10.3347/kjp.2020.58.3.287), 2020-06-26
Supplement: kjp-58-3-287-suppl1.pdf [file kjp-58-3-287-suppl1.pdf]

**Supplementary Table S1.** COG functional classification of all of the up-regulated differently expression genes

| COG functional classification      | Functional description                                        | DEGs Number |
|------------------------------------|---------------------------------------------------------------|-------------|
| Information storage and processing | RNA processing and modification                               | 16          |
| Information storage and processing | Chromatin structure and dynamics                              | 20          |
| metabolism                         | Energy production and conversion                              | 23          |
| cellular processes and signaling   | Cell cycle control, cell division, chromosome partitioning    | 10          |
| metabolism                         | Amino acid transport and metabolism                           | 22          |
| metabolism                         | Nucleotide transport and metabolism                           | 10          |
| metabolism                         | Carbohydrate transport and metabolism                         | 34          |
| metabolism                         | Coenzyme transport and metabolism                             | 12          |
| metabolism                         | Lipid transport and metabolism                                | 28          |
| Information storage and processing | Translation, ribosomal structure and biogenesis               | 51          |
| Information storage and processing | Transcription                                                 | 75          |
| Information storage and processing | Replication, recombination and repair                         | 19          |
| cellular processes and signaling   | Cell wall/membrane/envelope biogenesis                        | 5           |
| cellular processes and signaling   | Cell motility                                                 | 1           |
| cellular processes and signaling   | Posttranslational modification, protein turnover, chaperones  | 86          |
| metabolism                         | Inorganic ion transport and metabolism                        | 19          |
| metabolism                         | Secondary metabolites biosynthesis, transport and catabolism  | 3           |
| poorly characterized               | Function unknown                                              | 491         |
| cellular processes and signaling   | Signal transduction mechanisms                                | 81          |
| cellular processes and signaling   | Intracellular trafficking, secretion, and vesicular transport | 144         |
| cellular processes and signaling   | Defense mechanisms                                            | 2           |
| cellular processes and signaling   | Cytoskeleton                                                  | 30          |
