# Supplementary material for: Transcriptomic Features of Echinococcus granulosus Protoscolex during the Encystation Process
Source: PubMed Central journal article supplement — Korean J Parasitol. 2020 Jun 26;58(3):287–99. doi: 10.3347/kjp.2020.58.3.287 (PMC7338903; doi:10.3347/kjp.2020.58.3.287), 2020-06-26
Supplement: kjp-58-3-287-suppl2.pdf [file kjp-58-3-287-suppl2.pdf]

**Supplementary Table S2.** The 24 involved in vasopressin-regulated water reabsorption metabolic pathways (map 04962) DEGs

| Gene_name | Gene_annotation                               | <i>E.granulosus_PSC (TPM)</i> |              |              |              |              |
|-----------|-----------------------------------------------|-------------------------------|--------------|--------------|--------------|--------------|
|           |                                               | 0 d                           | 10 d         | 20 d         | 40 d         | 80 d         |
| EGR_01105 | Synaptobrevin-like protein                    | 36.793333                     | 49.033333    | 89.83        | 77.183333    | 73.48        |
| EGR_00994 | Dynein light chain 1, cytoplasmic             | 4,701.273333                  | 3,213.233333 | 4,973.41     | 2,982.723333 | 2,477.35     |
| EGR_01000 | Ras-related protein Rab-5B                    | 207.766667                    | 227.086667   | 267.126667   | 436.406667   | 370.566667   |
| EGR_09465 | Dynein light chain LC6, flagellar outer arm   | 410.666667                    | 370.95       | 344.976667   | 888.92       | 1,395.033333 |
| EGR_09466 | Dynein light chain 2, cytoplasmic             | 96.753333                     | 197.01       | 103.11       | 73.466667    | 32.613333    |
| EGR_09468 | Dynein light chain 1, cytoplasmic             | 106.006667                    | 596.66       | 500.763333   | 25.01        | 50.236667    |
| EGR_09469 | Dynein light chain 2, cytoplasmic             | 394.273333                    | 955.76       | 205.016667   | 1,265.82     | 2,761.786667 |
| EGR_09471 | Dynein light chain 2, cytoplasmic             | 2,061.106667                  | 11,104.58667 | 2,796.213333 | 1,605.313333 | 2,360.663333 |
| EGR_09472 | Dynein light chain 2, cytoplasmic             | 177.17                        | 431.186667   | 277.743333   | 264.846667   | 446.753333   |
| EGR_09473 | Dynein light chain 2, cytoplasmic             | 1,092.726667                  | 4,064.573333 | 1,647.54     | 551.613333   | 799.05       |
| EGR_09474 | Dynein light chain, cytoplasmic               | 114.516667                    | 199.91       | 82.636667    | 86.446667    | 57.96        |
| EGR_08563 | Dynein light chain LC6, flagellar outer arm   | 402.22                        | 559.656667   | 720.69       | 387.513333   | 249.21       |
| EGR_07359 | Dynein light chain, flagellar outer arm       | 144.413333                    | 235.196667   | 287.583333   | 186.456667   | 241.366667   |
| EGR_06451 | Dynein light chain 1, cytoplasmic             | 108.786667                    | 215.916667   | 63.323333    | 71.523333    | 33.27        |
| EGR_06165 | Dynein light chain LC6, flagellar outer arm   | 238.45                        | 325.606667   | 189.696667   | 262.283333   | 218.126667   |
| EGR_05573 | Cytoplasmic dynein 1 light intermediate chain | 49.593333                     | 177.743333   | 56.26        | 160.11       | 176.016667   |
| EGR_05427 | Dynein light chain 2, cytoplasmic             | 1,779.303333                  | 1,529.096667 | 2,831.883333 | 1,382.24     | 928.703333   |
| EGR_05428 | Dynein light chain 1, cytoplasmic             | 364.893333                    | 918.94       | 790.543333   | 147.406667   | 35.95        |
| EGR_04883 | Dynein light chain 1, cytoplasmic             | 152.203333                    | 131.516667   | 350.92       | 198.576667   | 149.15       |
| EGR_04157 | Aquaporin-4                                   | 10.88                         | 22.42        | 9.613333     | 11.973333    | 6.833333     |
| EGR_04164 | Aquaporin-4                                   | 27.273333                     | 18.636667    | 43.773333    | 13.396667    | 11.953333    |
| EGR_03187 | Dynein light chain 1, cytoplasmic             | 515.243333                    | 766.173333   | 730.986667   | 631.886667   | 637.336667   |
| EGR_03080 | Dynactin subunit 5                            | 125.846667                    | 200.196667   | 205.7        | 120.066667   | 86.103333    |
| EGR_02264 | Dynein light chain 1, cytoplasmic             | 146.586667                    | 404.686667   | 42.023333    | 65.653333    | 57.563333    |
