# Supplementary material for: Transcriptomic Features of Echinococcus granulosus Protoscolex during the Encystation Process
Source: PubMed Central journal article supplement — Korean J Parasitol. 2020 Jun 26;58(3):287–99. doi: 10.3347/kjp.2020.58.3.287 (PMC7338903; doi:10.3347/kjp.2020.58.3.287), 2020-06-26
Supplement: kjp-58-3-287-suppl3.pdf [file kjp-58-3-287-suppl3.pdf]

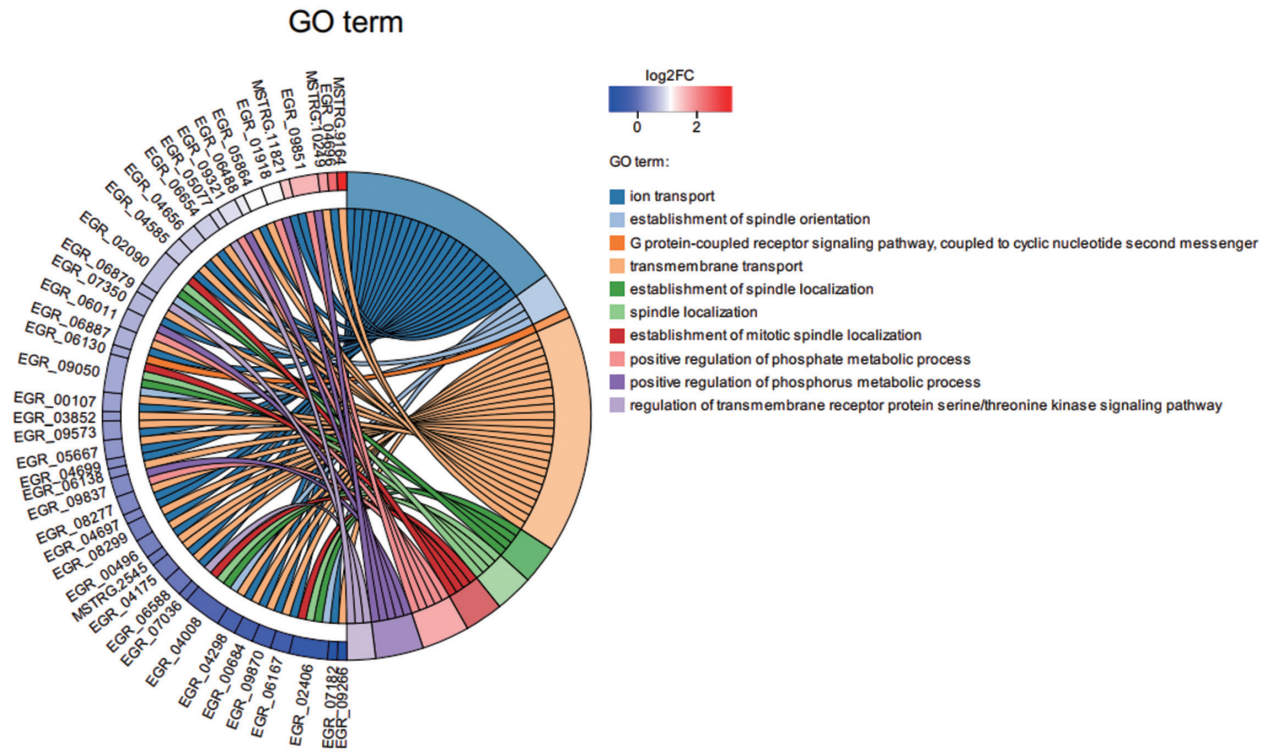

**Supplementary Fig. S1.** GO enrichment chord analysis of the top 10 GO terms with an FDR value < 0.05 on the DEGs between EgPSC\_0d and EgPSC\_10d.
